# Supplementary material
Source: MDPI journal article supplement (https://www.mdpi.com/2073-4395/12/8/1865)
Supplement: s1 [file s1]

Archive with 10 entries (10 files):
- Supplementary Note S1. The instruction of 3DPhenoMVS.pdf
- Supplementary Video S1. Operating procedure for 3DPhenoMVS.mp4
- Supplementary Video S2.mp4
- Supplementary Video S3.mp4
- Supplementary Video S4.mp4
- Supplementary Video S5.mp4
- Supplementary Video S6.mp4
- Supplementary Video S7.mp4
- Supplementary Video S8.mp4
- Supplementary Video S9.mp4
